# Supplementary material for: Insights into hydrophobic (meth)acrylate polymers as coating for slow-release fertilizers to reduce nutrient leaching
Source: Royal Society of Chemistry journal article supplement (doi:10.1039/d4py00573b), 2024-01-01
Supplement: d4py00573b1.pdf [file d4py00573b1.pdf]

## Electronic Supporting Information

### Insights into Hydrophobic (Meth)acrylate Polymers as Coating for Slow-Release fertilizers reduce Nutrients Leaching

Asma Sofyane,<sup>a</sup> Salima Atlas,<sup>a,b</sup> Mohammed Lahcini,<sup>a,c</sup> Elvira Vidović,<sup>d</sup> Bruno Ameduri,<sup>e,\*</sup> Mustapha Raihane<sup>a,f,\*</sup>

<sup>a</sup> IMED-Lab. Faculty of Sciences and Techniques, Cadi-Ayyad University, Av. A. Khattabi. BP 549, 40000 Marrakech, Morocco

<sup>b</sup> ERSIC, FPBM, Sultan Moulay Slimane University, PO. Box. 592, Mghila, 23000, Beni Mellal, Morocco

<sup>c</sup> Mohammed VI Polytechnic University, 43150 Ben Guérir, Morocco

<sup>d</sup> Faculty of Chemical Engineering and Technology, University of Zagreb, Marulićevtrg 19, 10000 Zagreb, Croatia

<sup>e</sup> ICGM, University of Montpellier, CNRS, ENSCM, 34095 Montpellier, France

<sup>f</sup> Applied Chemistry and Engineering Research Centre of Excellence (ACER CoE), Mohammed VI Polytechnic University, Lot 660, Hay Moulay Rachid Ben Guérir, 43150, Morocco

\* Corresponding author: M. Raihane (Email: m.raihane@uca.ma) and B. Ameduri (Email: bruno.ameduri@enscm.fr)

#### I- Industries of commercially available coated fertilizers by polymers

#### II-Mathematical Modelling of Release Kinetics

#### Figure captions

**Fig. S1** FTIR spectra of TFEMA , PTFEMA , PFEHEMA and PPFEHEMA.

**Fig. S2** Water Contact Angle (WCA) of: (a) PTFEMA and (b) PPFEHEMA.

**Fig. S3** Elastic behavior of PPFEHEMA after stretching.

**Fig. S4** Thickness of DAP coated with PTFEMA and PPFEHEMA 1L and 2L and the corresponding percentage coating weight % (red color).

**Fig. S5** Nutrients saturation time of uncoated DAP and coated DAP using PTFEMA and PPFEHEMA 1L and 2L.

**Fig. S6** Example of release kinetic plots  $\ln(M_t/M_\infty)$  versus  $\ln(t)$  of coated DAP with PTFEMA and PPFEHEMA

## I- Industries of commercially available coated fertilizers by polymers

Commercially available natural resins and polymers coatings for controlled-release fertilizers are manufactured by different companies. More data about polymer Coated NPK Fertilizers Market Size & Share Analysis - Growth Trends & Forecasts (2024-2029) can be found in the following website:

<https://www.mordorintelligence.com/industry-reports/bio-degradable-polymer-coated-npk>

Some examples of these companies (including their websites) are mentioned in the following table \*:

| Polymer Coating                     | Company                                                                         | Trademark**                       | Release characteristics                                            |
|-------------------------------------|---------------------------------------------------------------------------------|-----------------------------------|--------------------------------------------------------------------|
| Polyolefin :<br>PE/EVA <sup>a</sup> | Manufactured by JCAM<br>AGRI in Japan<br><br>Distrubed in USA by<br>Florikan®   | Nutricote ®<br><br>(NPK = 18-6-8) | Longevity /Release:<br>360 days at 25 °C**                         |
| Alkyd-resin                         | ICL Specialty Fertilizers                                                       | Osmocote ®<br><br>(NPK = 15-9-12) | Longevity /Release:<br>5-6 months at 21 °C                         |
| Polyurethane                        | Manufactured by Koch<br>Agronomic Services<br>(USA)<br>Distributed by Harrell's | Polyon ®<br><br>(NPK = 19-4-8)    | The longevity of<br>Polyon® is related to<br>the coating thickness |

<sup>a</sup> : PE : polyethylene and EVA : poly(ethylene-co-vinyl acetate) copolymer

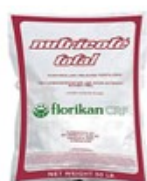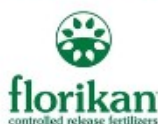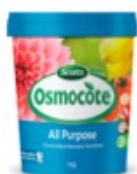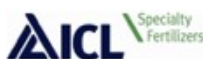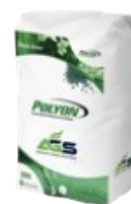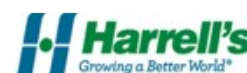

\* M.E. Trenkel. Slow and controlled-release and stabilized fertilizers, international fertilizer industry association, pp. 1–163, 2010.

[https://www.fertilizer.org/wp-content/uploads/2023/01/2010\\_Trenkel\\_slow-release-book.pdf](https://www.fertilizer.org/wp-content/uploads/2023/01/2010_Trenkel_slow-release-book.pdf)

\*\* <https://ipps.org/uploads/docs/6jSR%20Creamer%202018.pdf>

Osmocote®: <https://icl-growingsolutions.com/ornamental-horticulture/brands/osmocote-5/>

Nutricote®: <https://www.jcam-agri.co.jp/en/product/nutricote.html>

Florikan®: <https://www.florikan.com/about>

Polyon® : <https://www.harrells.com/>

<https://polyon.com/agriculture.html>

## II-Mathematical Modelling of Release Kinetics

Mathematical modeling is essential to gain deeper insight in understanding the nutrients release characteristics of the coated DAP, studied from the semi-empirical Ritger-Peppas model equation S1<sup>1</sup>:

$$\frac{M_t}{M_\infty} = k t^n \quad \text{Eq.S1}$$

where  $M_t$  and  $M_\infty$  represent the amounts of nutriment released at time  $t$  and at equilibrium, respectively,  $k$  is the diffusion constant which depends on the type of coating material,  $t$  is the release time while  $n$  is a diffusional exponent characterizing the release mechanism<sup>2</sup>. This model can be used to describe the release rate of fertilizers from polymer devices. In the case of  $n \leq 0.5$ , the nutrient release mechanism indicates Fickian diffusion. When  $n=1$ , the transport mechanism dominates, leading to zero-order release (Case II transport) corresponding to the relaxation release polymeric matrix. If  $n$  value is ranging between 0.5 and 1.0, the nutrient release behavior can be regarded as the superposition of both above phenomena, which is called “anomalous transport” (non-Fickian) driven by a combination of diffusion and relaxation of the coating matrix<sup>3</sup>. For  $n$  values greater than 1, a strong influence of the coating on retarding the release is assumed, which is gradually assigned to the diffusion (accelerating the process) by opening pores or degrading the structure (erosion of polymeric chain)<sup>2-4</sup>.

The linearisation of Eq. S1 leads to Eq. S2:

$$\ln \frac{M_t}{M_\infty} = \ln k + n \ln(t) \quad (\text{Eq. S2})$$

## References

- 1 P. L. Ritger and N. A. Peppas, *Journal of Controlled Release*, 1987, **5**, 23–36.
- 2 R. Bortoletto-Santos, C. Ribeiro and W. L. Polito, *J Appl Polym Sci.*, 2016, **133**, 1-8.
- 3 X. Wang, S. Lü, C. Gao, X. Xu, Y. Wei, X. Bai, C. Feng, N. Gao, M. Liu and L. Wu, *RSC Adv*, 2014, **4**, 18382.
- 4 K. Lubkowski, A. Smorowska, M. Sawicka, E. Wróblewska, A. Dzienisz, M. Kowalska and M. Sadłowski, *Polish Journal of Chemical Technology*, 2019, **21**, 52–58.

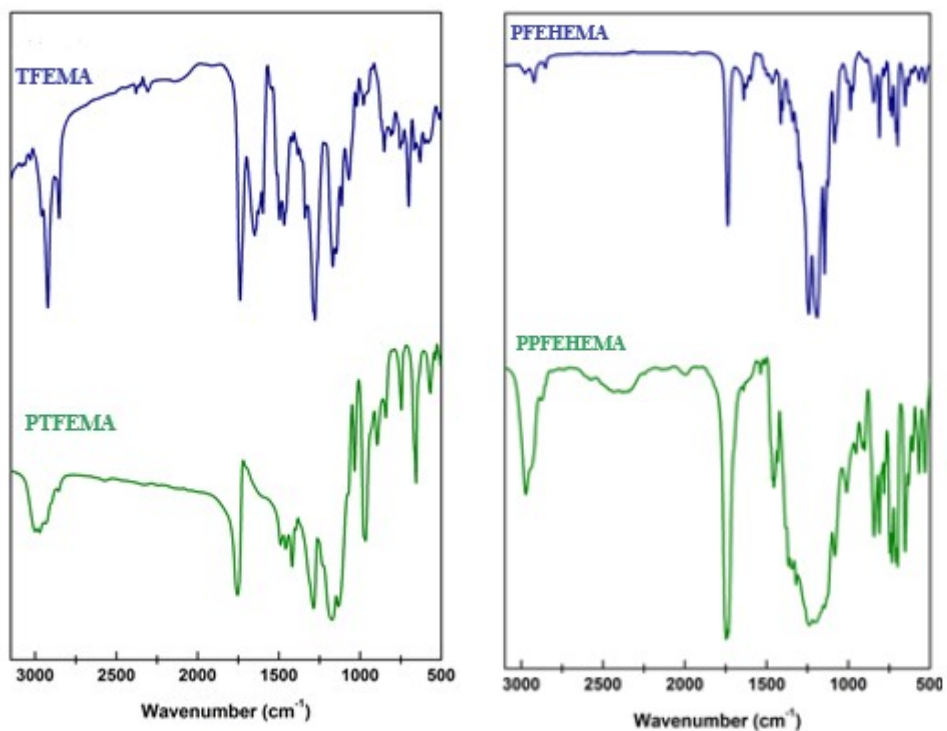

**Fig. S1** FTIR spectra of TFEMA, PTFEMA , PTFEMA and PPFHEMA.

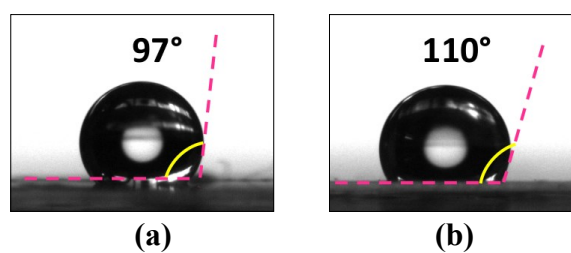

**Fig. S2** Water Contact Angle (WCA) of: (a) PTFEMA and (b) PPFHEMA

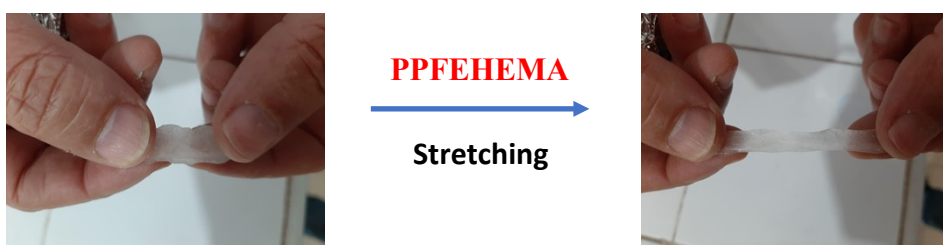

**Fig. S3** Elastomer behavior of PPFHEMA after stretching.

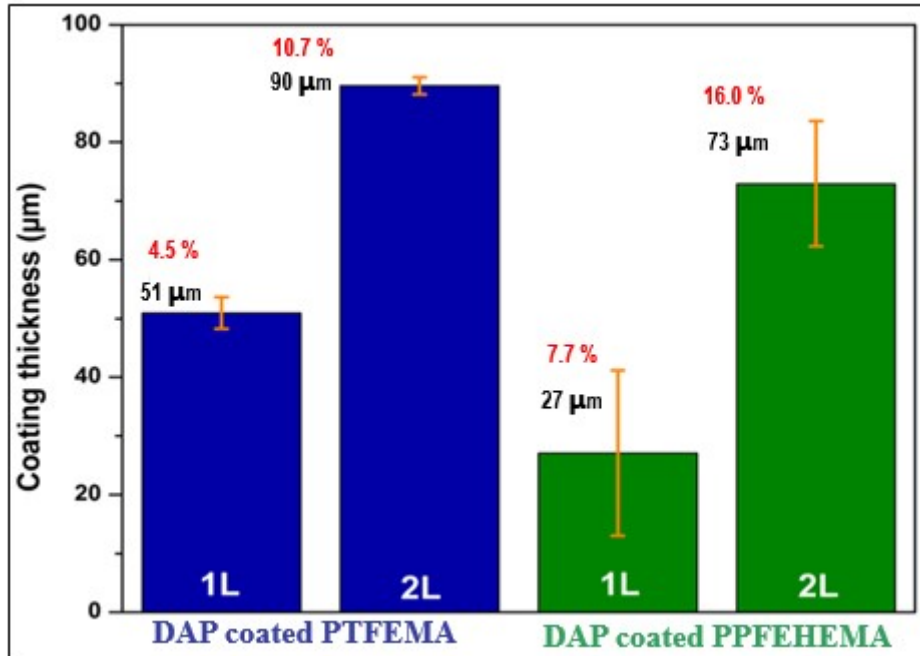

**Fig. S4** Thickness of DAP coated with PTFEMA and PPFHEMA 1L and 2L and the corresponding percentage coating weight % (red color)

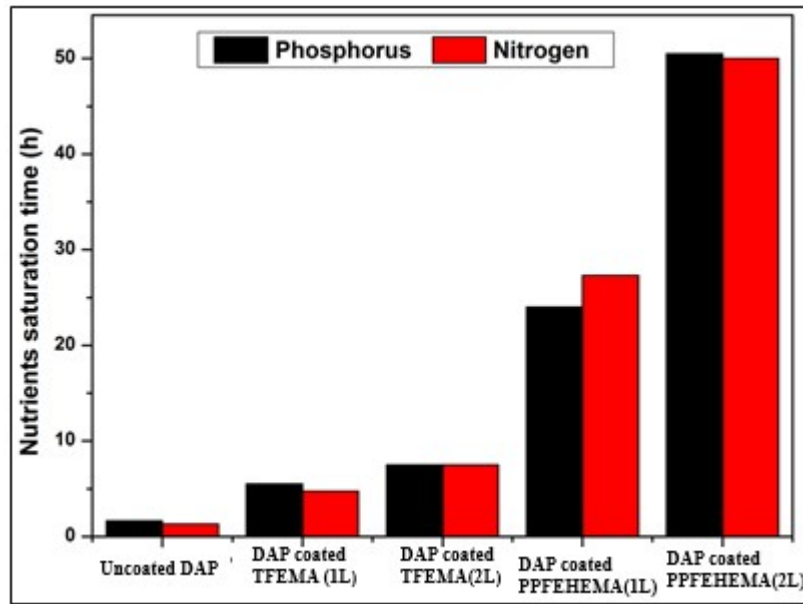

**Fig. S5** Nutrients saturation time of uncoated DAP and coated DAP using PTFEMA and PPFHEMA 1L and 2L.

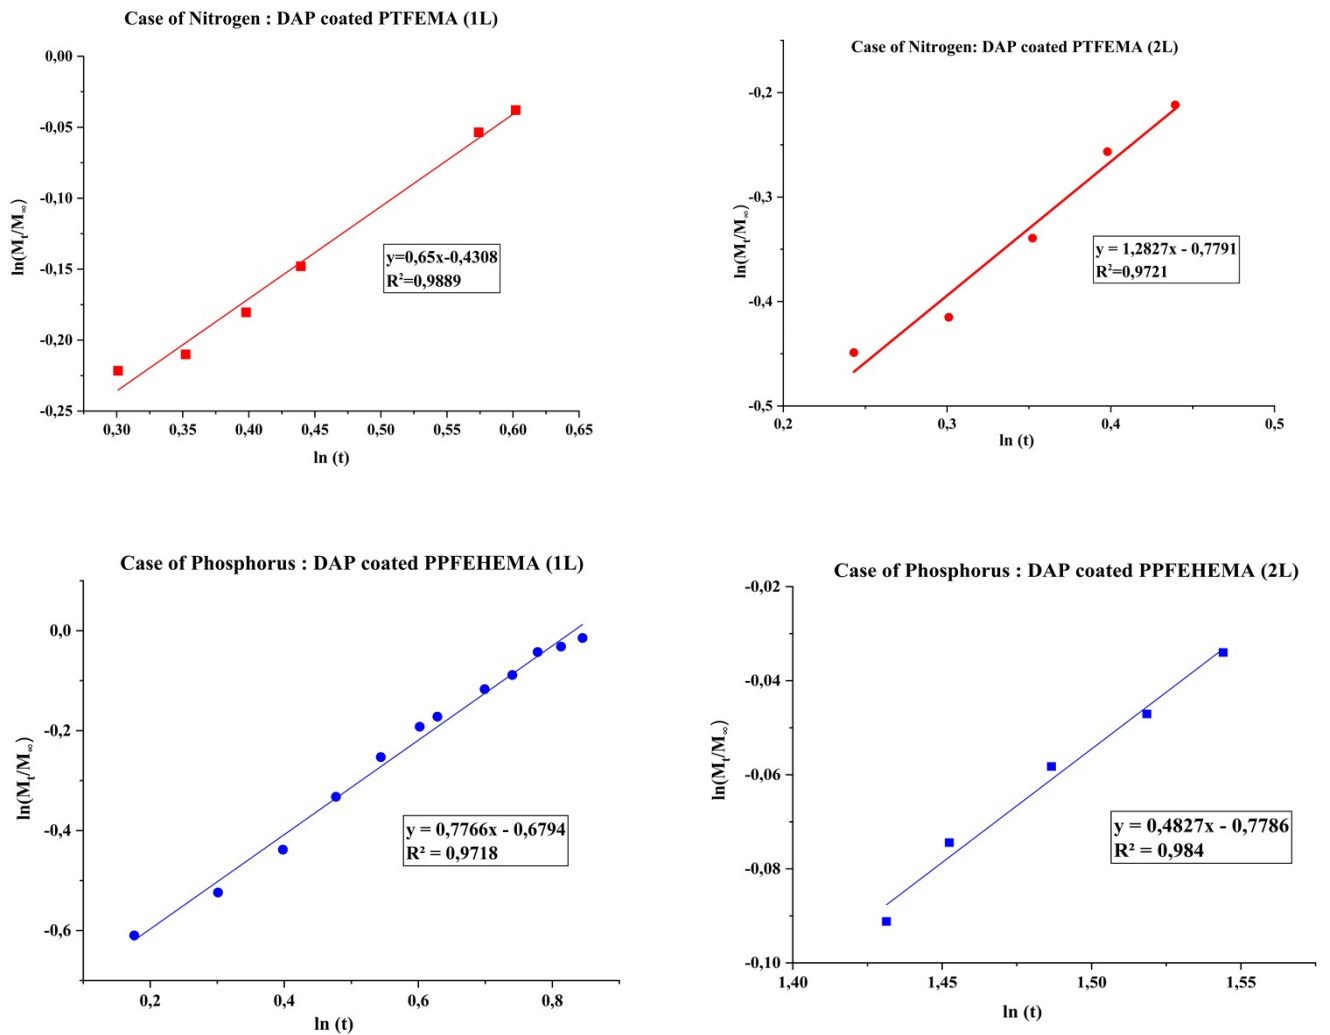

**Fig. S6** Example of release kinetic plots  $\ln(M_t/M_\infty)$  versus  $\ln(t)$  of coated DAP with PTFEMA and PPFHEMA
